19 **Summary statement (15-30 words)**

20 Murine DUX regulates transcription in the first embryonic cell divisions but it's  
21 not necessary for embryogenesis

22

23 **Abstract (180 words)**

24 Some of the earliest transcripts produced in fertilized human and mouse  
25 oocytes code for DUX, a double homeodomain protein that promotes  
26 embryonic genome activation (EGA). Deleting *Dux* by genome editing at the  
27 1- to 2-cell stage in the mouse impairs EGA and blastocyst maturation. Here,  
28 we demonstrate that mice carrying homozygous *Dux* deletions display  
29 markedly reduced expression of DUX target genes and defects in both pre-  
30 and post-implantation development, with notably a disruption of the pace of  
31 the first few cell divisions and significant rates of late embryonic mortality.  
32 However, some *Dux*<sup>-/-</sup> embryos give raise to viable pups, indicating that DUX  
33 is important but not strictly essential for embryogenesis.

34

## 35 **Introduction**

36 Fertilization of the vertebrate oocyte is followed by transcription of the parental  
37 genomes, a process known as zygotic or embryonic genome activation (ZGA  
38 or EGA) (Jukam et al., 2017). In zebrafish and *Drosophila*, maternally  
39 inherited transcription factors are responsible for this event (Lee et al., 2013;  
40 Liang et al., 2008), while in placental mammals the EGA transcriptional  
41 program is directly activated at or after the 2-cell (2C) stage by a family of  
42 transcription factors expressed after fertilization, the DUX proteins (De Iaco et  
43 al., 2017; Hendrickson et al., 2017; Whiddon et al., 2017). Recent studies  
44 suggest that DPPA2 and DPPA4 are maternal factors responsible in the  
45 mouse for DUX and downstream targets activation, although this model still  
46 needs to be validated *in vivo* (De Iaco et al., 2018; Eckersley-Maslin et al.,  
47 2019). Forced expression of DUX proteins in murine or human cell lines  
48 triggers the aberrant activation of EGA-restricted genes. Conversely, deleting  
49 *Dux* by CRISPR-mediated genome editing before the 2-cell stage in murine  
50 embryos leads to reduced expression of DUX targets such as *MERVL* and  
51 *Zscan4* and severe defects in early development, with many embryos failing  
52 to reach the morula/blastocyst stage (De Iaco et al., 2017). However, this  
53 procedure also yields some viable mice carrying heterozygous *Dux* deletions.  
54 Here, we demonstrate that crossing these  $Dux^{+/-}$  animals results in  $Dux^{-/-}$   
55 embryos with impaired EGA and severe but not uniformly fatal defects in early  
56 development.

57

## 58 **Results and discussion**

59 The murine *Dux* gene is found in tandem repeats of variable lengths in so-  
60 called macrosatellite repeats (Leidenroth et al., 2012). We injected zygotes  
61 collected from B6D2F1 mothers with sgRNAs directed at sequences flanking  
62 the *Dux* locus (Figure 1AB), and transferred the resulting products into  
63 pseudo-pregnant B6CBA mothers. One out of 42 pups carried a mono-allelic  
64 deletion of the targeted region (*Dux*<sup>+/-</sup>). This animal was backcrossed twice  
65 with wild-type (WT) B6D2F1 mice to ensure germline transmission of the  
66 mutation. The resulting *Dux*<sup>+/-</sup> mice were healthy and did not display any  
67 macroscopic phenotype.

68 Transcription of *Dux* normally starts in zygotes just after fertilization and stops  
69 a few hours later (De Iaco et al., 2017), suggesting that the presence of a  
70 functional *Dux* allele is not necessary in germ cells. In our previous work, we  
71 demonstrated that inhibition of DUX expression in zygotes impairs early  
72 embryonic development. To characterize further the role of DUX, *Dux*<sup>+/-</sup> mice  
73 were crossed and the frequency of *Dux* mono- and bi-allelic deletions was  
74 determined in the progeny (Table 1). There was only a minor deviation from a  
75 Mendelian distribution of these genotypes, with a slightly lower than expected  
76 frequency of *Dux*<sup>-/-</sup> pups. Furthermore, adult *Dux*<sup>-/-</sup> mice were healthy and  
77 had a normal lifespan. To ensure that *Dux* was not expressed from some  
78 other genomic locus, the absence of its transcripts was verified in testis of  
79 *Dux*<sup>-/-</sup> mice, since this is the only adult tissue where these RNAs are  
80 normally detected (Snider et al., 2010) (Figure 1C).

81 To explore further the role of DUX in pre-implantation embryos, we compared  
82 the size of litters yielded by isogenic *Dux*<sup>+/+</sup> or *Dux*<sup>-/-</sup> crossings (Table 2,

83 Figure 1D). Crosses between *Dux*<sup>-/-</sup> mice led to strong reductions in litter  
84 size and delayed delivery, and some of the rare pups were eaten by their  
85 mother after delivery, probably because they were either stillborn or exhibited  
86 physical impairments. Furthermore, some *Dux*<sup>-/-</sup> females failed to give any  
87 pup, even when crossed with *Dux*<sup>-/-</sup> males that had previously demonstrated  
88 their fertility when bred with other *Dux*<sup>-/-</sup> females (not illustrated). However,  
89 these apparently sterile *Dux*<sup>-/-</sup> females produced litters of normal size  
90 following crosses with wild type males (Figure 1E).

91 We then analyzed whether the strong lethality observed after (*Dux*<sup>-/-</sup> x *Dux*<sup>-/-</sup>)  
92 crosses occurred before or after implantation. For this, we repeated isogenic  
93 crosses of WT or *Dux*<sup>-/-</sup> mice, retrieved the zygotes at embryonic day 0.5  
94 (E0.5, 27 embryos from 3 (WT x WT) and 42 embryos from 5 (*Dux*<sup>-/-</sup> x *Dux*<sup>-/-</sup>)  
95 crosses), and monitored their *ex vivo* development for 4 days (Figure 2A). We  
96 found that up to E1.5 *Dux*<sup>-/-</sup> embryos divided faster than their WT  
97 counterparts yet sometimes unevenly, with formation of 3-cell (3C) structures.  
98 At E2.0, WT embryos caught up whereas *Dux*<sup>-/-</sup> embryos seemed partially  
99 blocked, to exhibit a clear delay at E3.5 with significantly reduced blastocyst  
100 formation. By E4.5, only 65% *Dux*<sup>-/-</sup> embryos reached the blastocyst stage,  
101 compared with 100% for WT. Confirming these findings, examination of E3.5  
102 embryos from (WT x WT) or (*Dux*<sup>-/-</sup> x *Dux*<sup>-/-</sup>) crosses revealed a strong delay  
103 in blastocyst formation and increased levels of lethality in the absence of DUX  
104 (Fig. 2BC). Finally, examining the uterus of *Dux*<sup>-/-</sup> females previously found  
105 to be sterile 18.5 days after crosses with *Dux*<sup>-/-</sup> males revealed a significant  
106 number of macroscopically normal embryos, suggesting that their apparent

107 sterility was partly due to perinatal mortality (Figure 2D). In conclusion, a  
108 subset of embryos derived from *Dux*<sup>-/-</sup> crosses fail to implant, while the rest  
109 generally dies around birth.

110 Finally, we tested the consequences of zygotic DUX on the transcriptional  
111 program of 2C-stage embryos. We collected 17 zygotes from three  
112 heterozygous *Dux*<sup>+/-</sup> x *Dux*<sup>+/-</sup> crosses, incubated them in vitro and collected  
113 RNA 5 hours after the formation of 2C embryos (Figure 3A). Three of these  
114 contained undetectable levels of *Dux* transcripts, indicating that they most  
115 likely were *Dux*<sup>-/-</sup>, and an additional 3 displayed decreased levels of this RNA  
116 compared to the other 11. Interestingly, all 6 *Dux* RNA-depleted 2C embryos  
117 exhibited significant reductions in the expression of some (*MERVL*, *Zscan4*,  
118 *Eif1a*, *Usp17la*, *B020004J07Rik*, *Tdpoz4* and *Cml2*), but not all (*Duxbl*, *Sp110*,  
119 *Zfp352*) genes previously suggested to represent DUX targets (De Iaco et al.,  
120 2017). We then bred 2 *WT* and 3 *Dux*<sup>-/-</sup> females with males from the same  
121 genetic background, and compared transcription of putative DUX target genes  
122 in the resulting 2C embryos. Products of the *Dux*<sup>-/-</sup> x *Dux*<sup>-/-</sup> crosses  
123 displayed a clear decrease in the expression of a subset of candidate DUX  
124 targets (*MERVL*, *Zscan4*, *Eif1a*, *Usp17la*, *B020004J07Rik*), while others  
125 (*Tdpoz4*, *Cml2*, *Duxbl*, *Sp110*, *Zfp352*) were again unaffected.

126 In sum, the present work confirms that DUX promotes murine embryonic  
127 development. In spite of also surprisingly demonstrating that this factor is not  
128 absolutely essential for this process, it further reveals that DUX depletion  
129 results in a variable combination of pre- and post-implantation defects, the  
130 consequences of which additionally appear cumulative over generations.

131 DUX-devoid embryos displayed deregulations in the timing and the ordinance  
132 of the first few cell divisions, various degrees of impairments in their ability to  
133 become blastocysts, and for those reaching that stage high levels of perinatal  
134 mortality. Nevertheless, these defects became truly apparent only at the  
135 second round of DUX-devoid embryogenesis, since the frequency of *Dux*<sup>-/-</sup>  
136 pups derived from the crossing of heterozygous *Dux*<sup>+/-</sup> parents was only  
137 slightly below a Mendelian distribution whereas the resulting *Dux*<sup>-/-</sup> females  
138 yielded markedly reduced progenies, some even appearing sterile when  
139 crossed with *Dux*<sup>-/-</sup> males. However, this defect was completely rescued by  
140 zygotic expression of *Dux*, since breeding these *Dux*<sup>-/-</sup> females with WT males  
141 resulted in the production of normal size litters of pups devoid of obvious  
142 defects. Thus, the presence of DUX during only a few hours after fertilization  
143 appears to condition not only the conduct of the first few embryonic cell  
144 divisions, but also to bear consequences that extend well beyond the pre-  
145 implantation period, long after *Dux* transcripts have become undetectable.  
146 Deleting the *Dux* inducers *Dppa2* or *Dppa4* also results in perinatal lethality  
147 (Madan et al., 2009; Nakamura et al., 2011), but in this case defects in lung  
148 and skeletal development are observed, which correlate with the expression  
149 of these two genes later in embryogenesis. Future studies should therefore  
150 attempt to characterize better the molecular defects induced by DUX depletion,  
151 to explain how the full impact of the *Dux* KO phenotype is only expressed at  
152 the second generation, and how even at that point it can be fully rescued by  
153 paternally-encoded *Dux* zygotic expression.

154

## 155 **Material and Methods**

156

### 157 *Plasmids*

158 Two single guide RNAs (sgRNAs) targeting sequences flanking the *Dux*  
159 macrosatellite repeat (Figure 1A) were cloned into px330 using a standard  
160 protocol. The primers used to clone the sgRNAs are previously described (De  
161 Iaco et al., 2017).

162

### 163 *Generation of transgenic mice carrying $Dux^{-/-}$ alleles*

164 Pronuclear injection was performed according to the standard protocol of the  
165 Transgenic Core Facility of EPFL. In summary, B6D2F1 mice were used as  
166 egg donors (6 weeks old). Mice were injected with PMSG (10 IU), and HCG  
167 (10 IU) 48 hours after. After mating females with B6D2F1 males, zygotes  
168 were collected and kept in KSOM medium pre-gassed in 5% CO<sub>2</sub> at 37 °C.  
169 Embryos were then transferred to M2 medium and microinjected with 10  
170 ng/μg of px330 plasmids encoding for Cas9 and the appropriate sgRNAs  
171 diluted in injection buffer (10mM Tris HCl pH7.5, 0.1mM EDTA pH8, 100mM  
172 NaCl). After microinjection, embryos were reimplanted in pseudopregnant  
173 B6CBA mothers. The pups delivered were genotyped for *Dux* null alleles  
174 using previously described primers (De Iaco et al., 2017). The mouse carrying  
175 the *Dux* null allele was then bred with B6D2F1 mice to ensure that the  
176 transgenic allele reached germ line and to dilute out any randomly integrated  
177 Cas9 transgene. This process was repeated once again to obtain second filial  
178 generation (F2) *Dux<sup>-/+</sup>* mice.



179

180 *Monitoring of pre-implantation embryos*

181 Zygotes were collected and cultured in KSOM medium at 37 °C in 5% CO<sub>2</sub> for  
182 4 days. Each embryo was monitored every 12 hours to determine the stage of  
183 development.

184 Randomization and blind outcome assessment were not applied. All animal  
185 experiments were approved by the local veterinary office and carried out in  
186 accordance with the EU Directive (2010/63/ EU) for the care and use of  
187 laboratory animals.

188

189 *Standard PCR, RT-PCR and RNA sequencing*

190 For genotyping the *Dux* null allele, genomic DNA was extracted with DNeasy  
191 Blood & Tissue Kits (QIAGEN) and the specific PCR products were amplified  
192 using PCR Master Mix 2X (Thermo Scientific) combined with the appropriate  
193 primers (design in Figure 1A) (De Iaco et al., 2017). Ambion Single Cell-to-CT  
194 kit (Thermo Fisher) was used for RNA extraction, cDNA conversion and  
195 mRNA pre-amplification of 2C stage embryos. Primers (previously listed) were  
196 used for SYBR green qPCR (Applied Biosystems) (De Iaco et al., 2017).

197

198 **Acknowledgements**

199 We thank the Transgenic Core Facility of EPFL for technical assistance. This  
200 work was financed through grants from the Swiss National Science  
201 Foundation, the Gebert-Rüf Foundation, FP7 MC-ITN INGENIUM (290123),  
202 and the European Research Council (ERC 694658) to D.T.

203

204 **Author contributions**

205 A.D.I and D.T. conceived the project and wrote the manuscript. A.D.I., S.V.,

206 S.O. designed the experiments, carried out the experiments and analyzed the

207 data.

208

209 **Conflict of interest**

210 The authors declare that they have no conflict of interest.

211

212

## 213 References

- 214 **De Iaco, A., Couderay, A., Duc, J. and Trono, D.** (2018). DPPA2 and DPPA4 are  
215 necessary to establish a totipotent state in mouse embryonic stem cells.  
216 *bioRxiv*.
- 217 **De Iaco, A., Planet, E., Coluccio, A., Verp, S., Duc, J. and Trono, D.** (2017). DUX-  
218 family transcription factors regulate zygotic genome activation in  
219 placental mammals. *Nature genetics* **49**, 941-945.
- 220 **Eckersley-Maslin, M., Alda-Catalinas, C., Blotenburg, M., Kreibich, E.,**  
221 **Krueger, C. and Reik, W.** (2019). Dppa2 and Dppa4 directly regulate the  
222 Dux-driven zygotic transcriptional program. *Genes & development* **33**,  
223 194-208.
- 224 **Hendrickson, P. G., Dorais, J. A., Grow, E. J., Whiddon, J. L., Lim, J. W., Wike, C.**  
225 **L., Weaver, B. D., Pflueger, C., Emery, B. R., Wilcox, A. L., et al.** (2017).  
226 Conserved roles of mouse DUX and human DUX4 in activating cleavage-  
227 stage genes and MERVL/HERVL retrotransposons. *Nature genetics* **49**,  
228 925-934.
- 229 **Jukam, D., Shariati, S. A. M. and Skotheim, J. M.** (2017). Zygotic Genome  
230 Activation in Vertebrates. *Developmental cell* **42**, 316-332.
- 231 **Lee, M. T., Bonneau, A. R., Takacs, C. M., Bazzini, A. A., DiVito, K. R., Fleming,**  
232 **E. S. and Giraldez, A. J.** (2013). Nanog, Pou5f1 and SoxB1 activate zygotic  
233 gene expression during the maternal-to-zygotic transition. *Nature* **503**,  
234 360-364.
- 235 **Leidenroth, A., Clapp, J., Mitchell, L. M., Coneyworth, D., Dearden, F. L.,**  
236 **Iannuzzi, L. and Hewitt, J. E.** (2012). Evolution of DUX gene  
237 macrosatellites in placental mammals. *Chromosoma* **121**, 489-497.
- 238 **Liang, H. L., Nien, C. Y., Liu, H. Y., Metzstein, M. M., Kirov, N. and Rushlow, C.**  
239 (2008). The zinc-finger protein Zelda is a key activator of the early zygotic  
240 genome in Drosophila. *Nature* **456**, 400-403.
- 241 **Madan, B., Madan, V., Weber, O., Tropel, P., Blum, C., Kieffer, E., Viville, S.**  
242 **and Fehling, H. J.** (2009). The pluripotency-associated gene Dppa4 is  
243 dispensable for embryonic stem cell identity and germ cell development  
244 but essential for embryogenesis. *Mol Cell Biol* **29**, 3186-3203.
- 245 **Nakamura, T., Nakagawa, M., Ichisaka, T., Shiota, A. and Yamanaka, S.** (2011).  
246 Essential roles of ECAT15-2/Dppa2 in functional lung development. *Mol*  
247 *Cell Biol* **31**, 4366-4378.
- 248 **Snider, L., Geng, L. N., Lemmers, R. J., Kyba, M., Ware, C. B., Nelson, A. M.,**  
249 **Tawil, R., Filippova, G. N., van der Maarel, S. M., Tapscott, S. J., et al.**  
250 (2010). Facioscapulohumeral dystrophy: incomplete suppression of a  
251 retrotransposed gene. *PLoS genetics* **6**, e1001181.
- 252 **Whiddon, J. L., Langford, A. T., Wong, C. J., Zhong, J. W. and Tapscott, S. J.**  
253 (2017). Conservation and innovation in the DUX4-family gene network.  
254 *Nature genetics* **49**, 935-940.  
255  
256  
257

## 258 **Figure Legends**

### 259 **Figure 1. DUX promotes embryonic development but is not necessary** 260 **for it**

261 **(A)** Schematics of CRISPR/Cas9 depletion of *Dux* alleles. Single guide RNAs  
262 (sgRNA) targeting the flanking region of the *Dux* repeat recruit Cas9  
263 nucleases for the excision of the allele. *Dux* and *Gm4981* are two isoforms of  
264 the *Dux* gene repeated in tandem in the *Dux* locus. *Smpdl3a* and *Gcc2* are  
265 the genes flanking the *Dux* locus. **(B)** Generation of *Dux*<sup>-/-</sup> transgenic mice.  
266 Zygotes were injected in the pronucleus with plasmids encoding for Cas9  
267 nuclease and the specific sgRNAs, transferred to a pseudopregnant mother  
268 and the transgenic pups were finally screened for the null alleles. **(C)**  
269 Expression of *Dux* in testes from adult *Dux*<sup>+/+</sup> and *Dux*<sup>-/-</sup> mice. **(D)** WT or  
270 *Dux* KO parents were crossed and litter size was quantified. **(E)** *Dux*<sup>-/-</sup>  
271 females were crossed with *Dux*<sup>-/-</sup> or *Dux*<sup>+/+</sup> males and litter size was  
272 quantified.

273

### 274 **Figure 2. Dux promotes both pre- and post-implantation development**

275 **(A)** Zygotes from *Dux*<sup>+/+</sup> (n = 3) or *Dux*<sup>-/-</sup> (n = 5) parents were monitored  
276 every 12 hours for their ability to differentiate *ex vivo* from embryonic day 1.5  
277 (E1.5) to 4.5 (E4.5). Average percent of *Dux*<sup>+/+</sup> (n = 27) or *Dux*<sup>-/-</sup> (n = 42)  
278 embryos reaching a specific embryonic stage at each time point is  
279 represented. E3.5 embryos from WT (n = 30) or *Dux* KO (n = 28) parents  
280 were collected. **(B)** Average percent of embryos reaching the late blastocyst  
281 stages (white) or failing to differentiate (delayed embryos, grey; dead embryos,

282 black) was quantified. **(C)** Bright-field images of the E3.5 embryos. **(D)** *Dux*<sup>-/-</sup>  
283 males and females were bred and number of born pups was quantified. The  
284 same animals were bred again and embryos were quantified at E18.5.

285

286 **Figure 3. A subset of ZGA-specific genes is not expressed in 2C in**  
287 **absence of DUX**

288 Comparative expression of *Dux*, early ZGA genes (*Zscan4*, *Eif1a*, *Usp17la*,  
289 *B020004J07Rik*, *Tdpoz4*, *Cml2*, *Duxbl*, *Sp110*, *Zfp352*), a 2C-restricted TE  
290 (MERVL), and *Zbed3*, a gene stably expressed during pre-implantation  
291 embryonic development, in 2C stage embryos derived from **(A)** *Dux*<sup>+/-</sup>  
292 breeding (n = 4) or **(B)** *Dux*<sup>+/+</sup> (n = 2) and *Dux*<sup>-/-</sup> (n = 3) breeding. Green and  
293 blue dots in (A) represent the mRNA levels of embryos expressing high or low  
294 levels of *Dux* respectively. Different shades of green or blue in (B) represent  
295 embryos collected from different mothers (975 and 960 are *Dux*<sup>+/+</sup> mothers,  
296 965, 992 and 994 are *Dux*<sup>-/-</sup> mothers). Expression was normalized to *Zbed3*.  
297 \*\* p ≤ 0.01, \*\*\* p ≤ 0.001, t test.

298

299 **Table Legends**

300 **Table 1 Genotype distribution from  $Dux^{+/-} \times Dux^{+/-}$  crosses**

| <b>Genotypes</b>                             | <b><math>Dux^{+/+}</math></b> | <b><math>Dux^{+/-}</math></b> | <b><math>Dux^{-/-}</math></b> |
|----------------------------------------------|-------------------------------|-------------------------------|-------------------------------|
| Observed n. of pups<br>(expected n. of pups) | 118<br>(109)                  | 225<br>(218)                  | 93<br>(109)                   |

301

302 **Table 2 Genotype distribution from  $Dux^{+/+} \times Dux^{+/+}$  and  $Dux^{-/-} \times Dux^{-/-}$**   
303 **crosses**

| <b>Crosses</b>                     | <b><math>Dux^{+/+} \times Dux^{+/+}</math></b> | <b><math>Dux^{-/-} \times Dux^{-/-}</math></b> |
|------------------------------------|------------------------------------------------|------------------------------------------------|
| Total n. pups (litters)            | 55 (6)                                         | 36 (17)                                        |
| Average litter size                | 9.2                                            | 2.1                                            |
| Day of delivery (embryonic days) * | 19.5                                           | 20.8                                           |

304

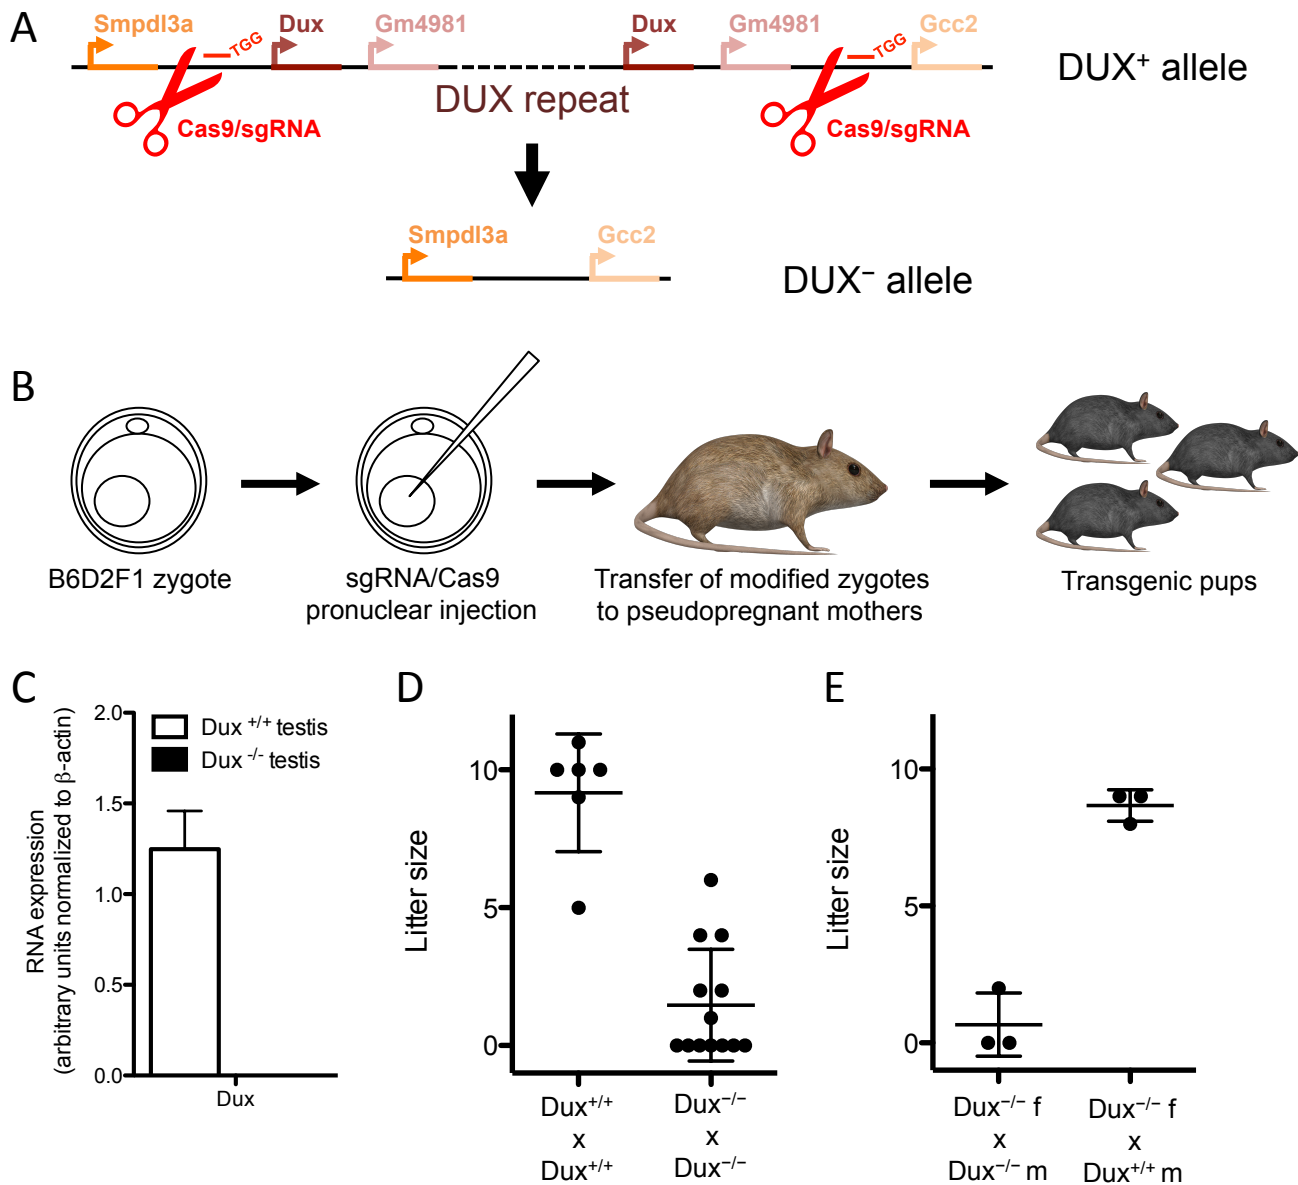

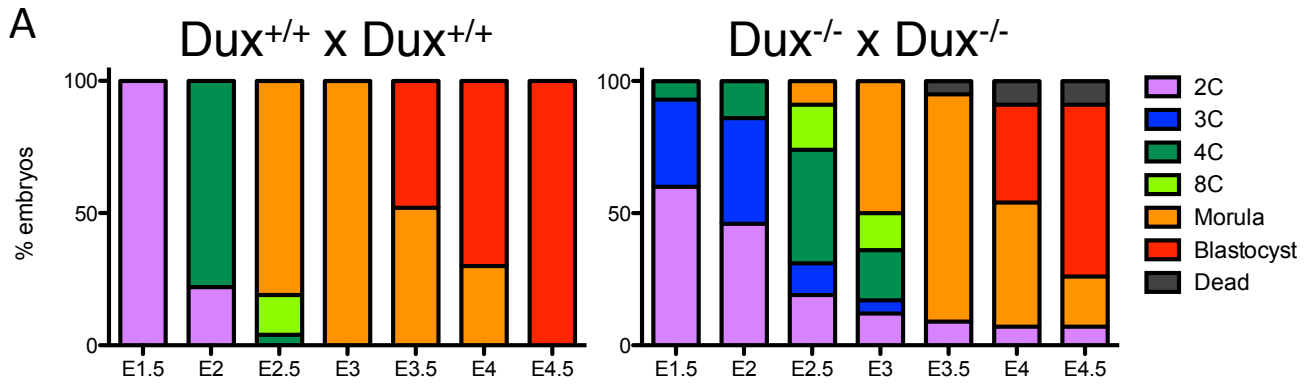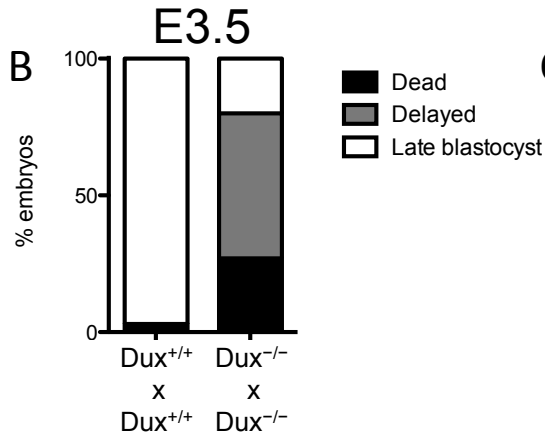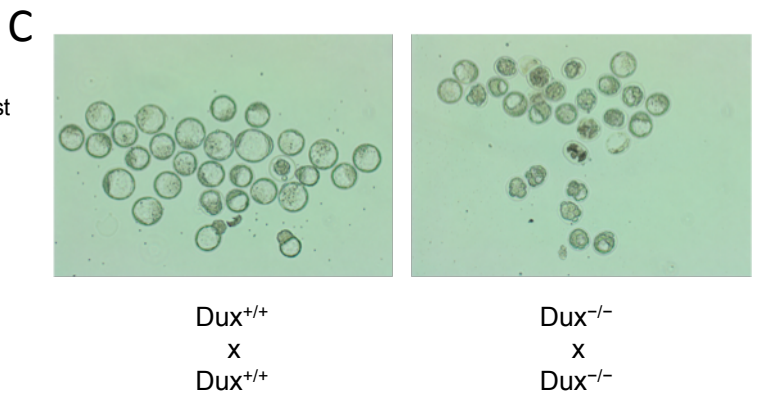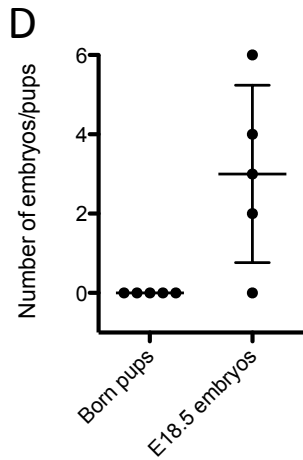



A

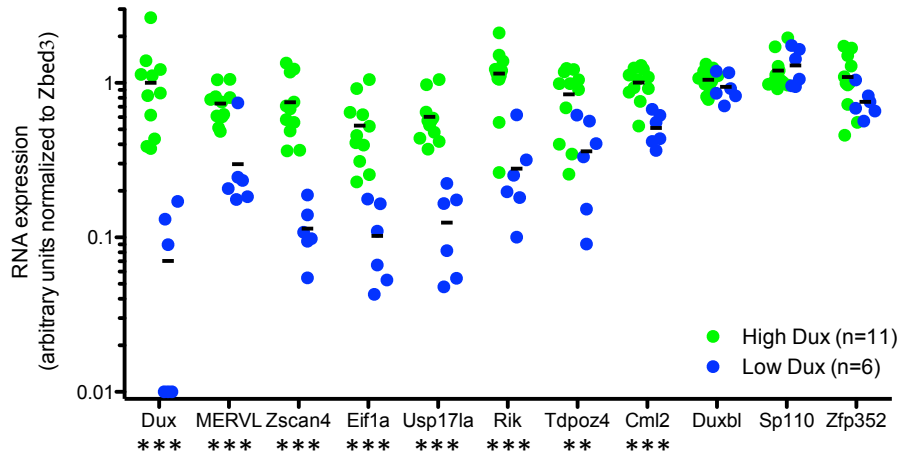

B

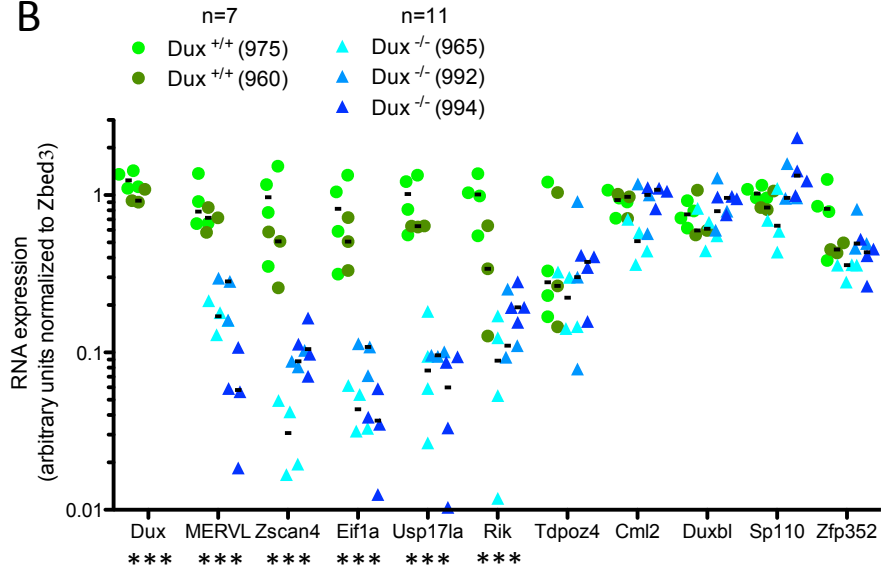

Source: https://www.biorxiv.org/content/10.1101/569434v1.full.pdf
